# Supplementary material for: The Change of Laboratory Tests Could Be Predictive Factors for Infection after McKeown Esophagogastrectomy
Source: Hindawi journal article supplement (doi:10.1155/2019/9718705), 2019-10-22
Supplement: f1 [file 9718705.f1.pdf]

# The change of laboratory tests could be predictive factors for infection after McKeown esophagogastrectomy

Chongxiang Chen<sup>1</sup>, Tianmeng Wen<sup>2</sup>, Qingyu Zhao<sup>1#</sup>

*<sup>1</sup>Department of Intensive Care Unit, Sun Yat-sen University Cancer Center; State Key Laboratory of Oncology in South China; Collaborative Innovation Center for Cancer Medicine, Guangzhou 510060, China;*

*<sup>2</sup> School of Public Health, Sun Yat-sen University, Guangzhou, Guangdong Province, China*

Chongxiang Chen: 599232426@qq.com

Tianmeng Wen: wentianmeng163@163.com

Qingyu Zhao: zhaoqy163@163.com

# Correspondence:

Address

Tel/Fax 86-13808896565

E-mail: zhaoqy163@163.com

**Supplementary Table. Clinical diagnosis pulmonary complication**

|  | <b>Pulmonary Complication</b> | <b>Non-Pulmonary</b> | <b>T value</b> | <b>P value</b> |
|--|-------------------------------|----------------------|----------------|----------------|
|--|-------------------------------|----------------------|----------------|----------------|

|                                                     | <b>Group (77)</b>  | <b>complication<br/>Group (281)</b> |        |         |
|-----------------------------------------------------|--------------------|-------------------------------------|--------|---------|
| <b>WBC (<math>\times 10^9/L</math>)</b>             | 5.57 $\pm$ 5.65    | 4.45 $\pm$ 3.81                     | -1.643 | 0.104   |
| <b>Neutrophils<br/>(<math>\times 10^9/L</math>)</b> | 7.01 $\pm$ 5.40    | 5.80 $\pm$ 3.37                     | -1.863 | 0.066   |
| <b>HB (g/L)</b>                                     | -11.89 $\pm$ 17.62 | -15.26 $\pm$ 16.03                  | -1.603 | 0.110   |
| <b>Serum ALB (g/L)</b>                              | -12.33 $\pm$ 3.48  | -10.79 $\pm$ 3.91                   | 3.131  | 0.002*  |
| <b>ALT (IU/L)</b>                                   | 24.85 $\pm$ 38.05  | 13.95 $\pm$ 57.23                   | -1.577 | 0.116   |
| <b>AST (IU/L)</b>                                   | 37.07 $\pm$ 48.18  | 23.28 $\pm$ 61.88                   | -1.810 | 0.071   |
| <b>BUN (mmol/L)</b>                                 | 2.25 $\pm$ 2.26    | 1.83 $\pm$ 2.78                     | -1.231 | 0.219   |
| <b>CRE (<math>\mu</math>mol/L)</b>                  | 0.10 $\pm$ 20.00   | -4.34 $\pm$ 16.51                   | -1.995 | 0.047*  |
| <b>Glucose (mmol/L)</b>                             | 5.36 $\pm$ 4.17    | 3.42 $\pm$ 2.71                     | -3.865 | <0.001* |
| <b>CRP (mg/L)</b>                                   | 75.31 $\pm$ 37.10  | 81.24 $\pm$ 34.52                   | 1.315  | 0.189   |
| <b>Lactic acid<br/>(mmol/L)</b>                     | 0.48 $\pm$ 1.29    | 0.12 $\pm$ 1.26                     | -2.175 | 0.030*  |
